# Supplementary material for: Crystalline NiFex nanoparticles homogeneously embedded in ordered mesoporous carbon for improved electrochemical hydrogen storage performance
Source: Royal Society of Chemistry journal article supplement (doi:10.1039/c3ce40369f), 2013-01-01
Supplement: c3ce40369f.pdf [file c3ce40369f.pdf]

## Supportion 1

The atomic ratio of Ni and Fe in the  $\text{NiFe}_x/\text{OMC}$  samples can be tested by EDX. It indicates the ratio of Ni to Fe is 1:0.95, 1:1.9, respectively for the  $\text{NiFe}/\text{OMC}$  and  $\text{NiFe}_2/\text{OMC}$  samples.

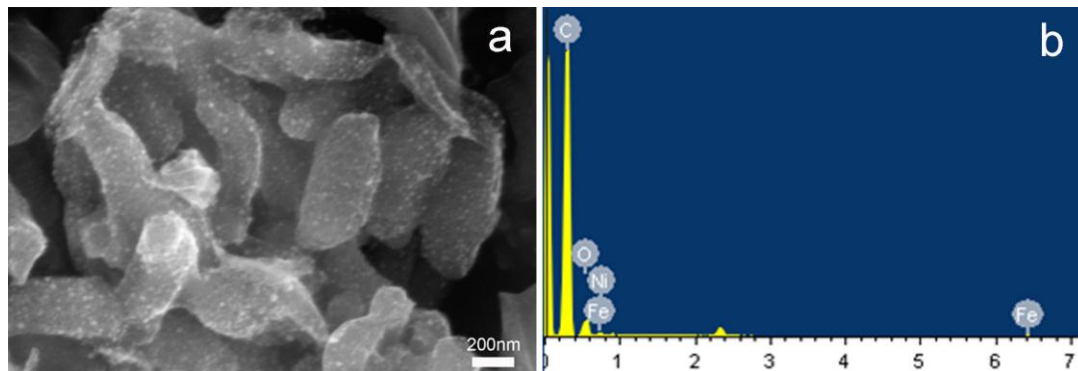

Figure S1 SEM and EDS images of  $\text{NiFe}_2/\text{OMC}$  sample.

HRTEM lattice image reveals that  $\text{NiFe}_2$  nanoparticles are spherical and crystalline (Figure S2). The lattice spacing of 0.1739 nm corresponds to the (111) plane of face-centred cubic (fcc) Ni.

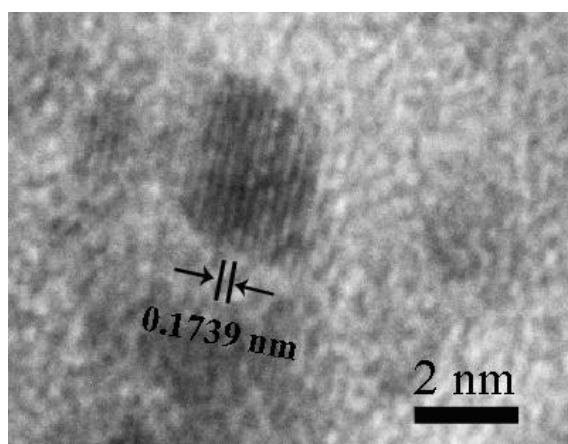

Figure S2 HRTEM lattice fringe morphology of as-synthesized  $\text{NiFe}_2/\text{OMC}$ .
